# Supplementary material for: Temperature-Dependent Growth of Geomyces destructans, the Fungus That Causes Bat White-Nose Syndrome
Source: PLoS One. 2012 Sep 28;7(9):e46280. doi: 10.1371/journal.pone.0046280 (PMC3460873; doi:10.1371/journal.pone.0046280)
Supplement: Table S2 — Mathematical formulas of the seven functions used for analyses. (DOCX) [file pone.0046280.s002.docx]

**Table S2.** Mathematical formulas utilized to fit each of the seven functions used in the analysis.

| **Function** | **Formula** |
| --- | --- |
| Gaussian |  |
| Modified Gaussian |  |
| Beta |  |
| Brière2 |  |
| Performance |  |
| Logan1 |  |
| Quadratic |  |
